# Supplementary material
Source: Springer Nature journal article supplement (https://www.springermedizin.de/resource/supplementary/13256_2009_1093_MOESM3_ESM.pdf/9646990)

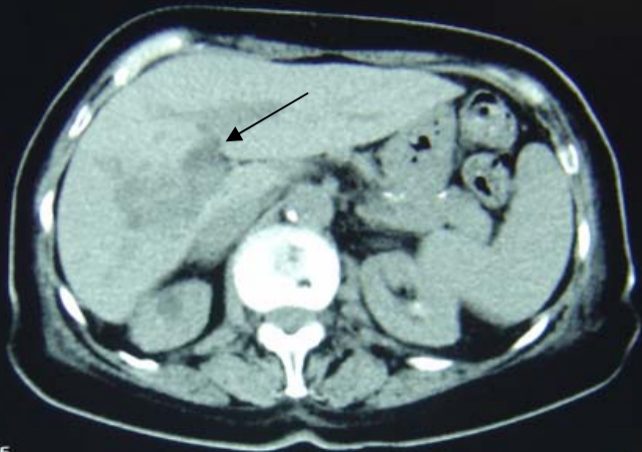

0  
As 75  
As 190

Supplement: MOESM3 [file 9646990]
